# Supplementary material for: A novel prognostic signature related to programmed cell death in osteosarcoma
Source: Front Immunol. 2024 Jul 1;15:1427661. doi: 10.3389/fimmu.2024.1427661 (PMC11250594; doi:10.3389/fimmu.2024.1427661)
Supplement: Supplementary Table 1 — A curated compilation of 61 published transcriptomic osteosarcoma prognostic models. [file Table_1.xlsx]

## Sheet: Sheet1
	Positive Primer	Reverse Primer
MLH1	5-CTCTTCATCAACCATCGTCTGG-3	5-GCAAATAGGCTGCATACACTGTT-3
SQLE	5-GGCATTGCCACTTTCACCTAT-3	5-GGCCTGAGAGAATATCCGAGAAG-3
EDIL3	5-AAATGGAGGTATCTGTTTGCCAG-3	5-CCCCTCGGTATGCTTCACTTATT-3
MTM1	5-GGCCCCATTAAGGGAAGAGTT-3	5-CTTGTCGCGCCTCCCATTT-3
CLTCL1	5-TCCTCCCTGTTCGCTTTCAG-3	5-CATGTCAATGATCGTGACCTGT-3
β-actin	5-CATGTACGTTGCTATCCAGGC-3	5-CTCCTTAATGTCACGCACGAT-3
