# Supplementary material for: A novel prognostic signature related to programmed cell death in osteosarcoma
Source: Front Immunol. 2024 Jul 1;15:1427661. doi: 10.3389/fimmu.2024.1427661 (PMC11250594; doi:10.3389/fimmu.2024.1427661)
Supplement: Supplementary Table 2 — Sequence information of qPCR primers for the five model genes. [file Table_2.xlsx]

## Sheet: Sheet1
A total of 109 published Osteosarcoma signatures were retrieved from the literatures.
Model	PMID	Type	Author	ENSEMBL	Coef
Model-1	34506683	mRNA	Lei T	SOCS1	−0.67009
Model-1	34506683	mRNA	Lei T	MYC	0.64282
Model-1	34506683	mRNA	Lei T	MUC1	0.33054
Model-1	34506683	mRNA	Lei T	FTH1	−0.69305
Model-1	34506683	mRNA	Lei T	G6PD	−0.64234
Model-1	34506683	mRNA	Lei T	ALOX15B	0.904224
Model-1	34506683	mRNA	Lei T	ATG7	−0.71787
Model-1	34506683	mRNA	Lei T	CBS	0.379009
Model-1	34506683	mRNA	Lei T	PEBP1	−0.68737
Model-1	34506683	mRNA	Lei T	FTL	−0.51299
Model-1	34506683	mRNA	Lei T	EGLN1	0.490507
Model-1	34506683	mRNA	Lei T	PGD	−0.51693
Model-1	34506683	mRNA	Lei T	GSS	−0.55546
Model-1	34506683	mRNA	Lei T	SLC39A8	−0.41425
Model-1	34506683	mRNA	Lei T	DPP4	−0.21404
Model-2	36275664	mRNA	Lv YG	EVI2B	-0.1913
Model-2	36275664	mRNA	Lv YG	AIM1	-0.1043
Model-2	36275664	mRNA	Lv YG	PRKACB	-0.1502
Model-2	36275664	mRNA	Lv YG	TCEA3	0.2488
Model-3	33937273	mRNA	Qian H	ALOX15B	1.7063
Model-3	33937273	mRNA	Qian H	ME1	0.7626
Model-3	33937273	mRNA	Qian H	GPD1	0.62
Model-4	36630752	mRNA	Zhang Z	MTDH	0.371
Model-4	36630752	mRNA	Zhang Z	ATF4	1.275
Model-4	36630752	mRNA	Zhang Z	MAPK1	-0.9832
Model-4	36630752	mRNA	Zhang Z	ANXA5	-0.161
Model-4	36630752	mRNA	Zhang Z	PPARG	-0.97
Model-5	35568866	mRNA	Chen SJ	CSTF2	0.03583
Model-5	35568866	mRNA	Chen SJ	ADAR	-0.011308
Model-5	35568866	mRNA	Chen SJ	WTAP	-0.01465
Model-6	33816483	mRNA	Fu YC-FCDB	P4HA1	4.01
Model-6	33816483	mRNA	Fu YC-FCDB	DCN	-4.46
Model-7	36244998	mRNA	Zhang J	CHMP4C	0.0989364	same article
Model-7	36244998	mRNA	Zhang J	GZMA	-0.00405572
Model-7	36244998	mRNA	Zhang J	BAK1	-0.0550377
Model-7	36244998	mRNA	Zhang J	GSDMA	-0.602812
Model-7	36244998	mRNA	Zhang J	CASP1	-0.0995357
Model-7	36244998	mRNA	Zhang J	CASP6	-0.167804
Model-8	36244998	lncRNA	Zhang J	AC090559.1	-0.709484
Model-8	36244998	lncRNA	Zhang J	AC010894.2	-0.475063
Model-8	36244998	lncRNA	Zhang J	FOXD2.AS1	-0.218033
Model-8	36244998	lncRNA	Zhang J	BX322562.1	-0.12479
Model-8	36244998	lncRNA	Zhang J	AL035446.1	-0.11157
Model-8	36244998	lncRNA	Zhang J	AC016596.1	0.0499574
Model-8	36244998	lncRNA	Zhang J	AC018904.1	0.0983331
Model-8	36244998	lncRNA	Zhang J	UNC5B.AS1	0.46718
Model-8	36244998	lncRNA	Zhang J	SENCR	0.869352
Model-9	36211822	mRNA	Jiang MY	ACO2	0.7576
Model-9	36211822	mRNA	Jiang MY	CTNNBIP1	-0.924
Model-9	36211822	mRNA	Jiang MY	LRRC1	1.3637
Model-10	36439512	mRNA	Wang XX	ATF4	0.705
Model-10	36439512	mRNA	Wang XX	ATM	0.503
Model-10	36439512	mRNA	Wang XX	HILPDA	0.616
Model-10	36439512	mRNA	Wang XX	MUC1	0.323
Model-10	36439512	mRNA	Wang XX	CBS	0.417
Model-10	36439512	mRNA	Wang XX	MT1G	0.238
Model-10	36439512	mRNA	Wang XX	ARNTL	-0.969
Model-10	36439512	mRNA	Wang XX	PML	-0.553
Model-11	36569871	mRNA	Zhang ZM	RPL37A	0.662
Model-11	36569871	mRNA	Zhang ZM	PLD3	-0.798
Model-11	36569871	mRNA	Zhang ZM	MEF2C	0.51
Model-11	36569871	mRNA	Zhang ZM	SNX2	-1.363
Model-12	36275679	mRNA	Su ZX	GPI	0.0026
Model-12	36275679	mRNA	Su ZX	MGEA5	0.017
Model-12	36275679	mRNA	Su ZX	OGT	0.042
Model-12	36275679	mRNA	Su ZX	PGM3	0.057
Model-12	36275679	mRNA	Su ZX	UAP1	0.008
Model-13	34828292	mRNA	Xu AK	CKLF	-0.537343
Model-13	34828292	mRNA	Xu AK	DKK1	0.312513
Model-13	34828292	mRNA	Xu AK	MYC	0.320497
Model-14	34894177	mRNA	Shi DY	MYC	0.4998
Model-14	34894177	mRNA	Shi DY	COL13A1	0.2715
Model-14	34894177	mRNA	Shi DY	UHRF2	0.3338
Model-14	34894177	mRNA	Shi DY	MT1A	0.2558
Model-14	34894177	mRNA	Shi DY	ACTB	-0.4997
Model-14	34894177	mRNA	Shi DY	GBP1	-0.2012
Model-15	36387908	mRNA	Huang W	ADH5	-0.795
Model-15	36387908	mRNA	Huang W	DCN	-0.47
Model-15	36387908	mRNA	Huang W	G6PD	-1.02
Model-15	36387908	mRNA	Huang W	PGAM1	-1.114
Model-15	36387908	mRNA	Huang W	ZNF292	1.157
Model-15	36387908	mRNA	Huang W	CDK1	0.812
Model-15	36387908	mRNA	Huang W	PFKFB2	-2.043
Model-15	36387908	mRNA	Huang W	FAM162A	1.456
Model-15	36387908	mRNA	Huang W	GNPDA2	-1.047
Model-15	36387908	mRNA	Huang W	SDC3	-0.748
Model-15	36387908	mRNA	Huang W	INSR	1.278
Model-15	36387908	mRNA	Huang W	GLCE	0.671
Model-15	36387908	mRNA	Huang W	HS2ST1	-1.841
Model-16	32448271	mRNA	Wu GZ	KCNJ15	0.0501
Model-16	32448271	mRNA	Wu GZ	SLC24A4	-0.392
Model-16	32448271	mRNA	Wu GZ	ASPA	0.0661
Model-16	32448271	mRNA	Wu GZ	REM1	-0.0633
Model-16	32448271	mRNA	Wu GZ	SCARA5	-0.024
Model-16	32448271	mRNA	Wu GZ	LANCL3	0.143
Model-16	32448271	mRNA	Wu GZ	CPA6	0.0522
Model-16	32448271	mRNA	Wu GZ	TRH	0.0592
Model-17	36586072	mRNA	Ning B	CXCR4	-1.07872
Model-17	36586072	mRNA	Ning B	MBTPS2	-3.16546
Model-17	36586072	mRNA	Ning B	MYC	0.826029
Model-18	37452172	mRNA	Yang L	PSMC4	-1.1189
Model-18	37452172	mRNA	Yang L	NUDT6	-0.7179
Model-18	37452172	mRNA	Yang L	CMKLR1	-0.5081
Model-18	37452172	mRNA	Yang L	PLXNB1	0.3812
Model-18	37452172	mRNA	Yang L	JAG2	0.3118
Model-19	35463956	mRNA	Li JQ	APLNR	-4.377	same article
Model-19	35463956	mRNA	Li JQ	TPM2	12.781
Model-19	35463956	mRNA	Li JQ	PGF	5.755
Model-19	35463956	mRNA	Li JQ	CD86	-11.809
Model-19	35463956	mRNA	Li JQ	PROCR	11.874
Model-19	35463956	mRNA	Li JQ	SEMA4D	-3.496
Model-20	35463956	mRNA	Li JQ	HLA-B	0.623
Model-20	35463956	mRNA	Li JQ	PGF	0.568
Model-21	37007130	mRNA	Hu H	BTBD10	-1.86261
Model-21	37007130	mRNA	Hu H	DLX1	0.29784
Model-21	37007130	mRNA	Hu H	MRTFA	-0.925208
Model-21	37007130	mRNA	Hu H	PLCD3	0.151495
Model-21	37007130	mRNA	Hu H	RFX3	1.05478
Model-22	35598382	mRNA	Fu YC-Transl Oncol	HSBP1	0.44
Model-22	35598382	mRNA	Fu YC-Transl Oncol	IER3	-0.34
Model-23	36345453	mRNA	Liang	NPC2	0.28321
Model-23	36345453	mRNA	Liang	CTSO	0.38456
Model-23	36345453	mRNA	Liang	APBB1IP	0.559
Model-23	36345453	mRNA	Liang	IGF2	0.26218
Model-24	34188683	mRNA	Xiao	WDR1	-0.767
Model-24	34188683	mRNA	Xiao	PML	-0.674
Model-24	34188683	mRNA	Xiao	MAP3K5	-2.046
Model-24	34188683	mRNA	Xiao	GNPDA2	-2.534
Model-24	34188683	mRNA	Xiao	BAMBI	-0.307
Model-25	35576501	mRNA	Hong JJ	ARHGEF2	0.013669
Model-25	35576501	mRNA	Hong JJ	ATF4	0.353966
Model-25	35576501	mRNA	Hong JJ	BAK1	−0.030721347
Model-25	35576501	mRNA	Hong JJ	BCL10	−0.194735056
Model-25	35576501	mRNA	Hong JJ	BNIP3	0.440218
Model-25	35576501	mRNA	Hong JJ	CRIP1	0.0196108
Model-25	35576501	mRNA	Hong JJ	EYA2	−0.022000565
Model-25	35576501	mRNA	Hong JJ	MAGEA3	−0.146158789
Model-25	35576501	mRNA	Hong JJ	PDK1	0.0488498
Model-25	35576501	mRNA	Hong JJ	PDK2	−0.248592614
Model-25	35576501	mRNA	Hong JJ	PLEKHF1	−0.043632439
Model-25	35576501	mRNA	Hong JJ	PML	−0.157323635
Model-25	35576501	mRNA	Hong JJ	PSMD10	−0.057405651
Model-25	35576501	mRNA	Hong JJ	PTGIS	0.128941
Model-25	35576501	mRNA	Hong JJ	PTPN1	−0.143609316
Model-25	35576501	mRNA	Hong JJ	RNF34	−0.406556251
Model-25	35576501	mRNA	Hong JJ	RPS3	0.0620985
Model-25	35576501	mRNA	Hong JJ	TERT	0.526582
Model-25	35576501	mRNA	Hong JJ	TGFBR1	−0.090918483
Model-25	35576501	mRNA	Hong JJ	TRIM32	−0.027423747
Model-25	35576501	mRNA	Hong JJ	UNC5B	0.0477964
Model-26	36151259	mRNA	Hua L	MYCT1	0.210457
Model-26	36151259	mRNA	Hua L	BNIP3L	0.194296
Model-26	36151259	mRNA	Hua L	LRP1	0.131816
Model-26	36151259	mRNA	Hua L	OPTN	0.112333
Model-26	36151259	mRNA	Hua L	TRIP6	0.0206559
Model-26	36151259	mRNA	Hua L	ATF4	0.00548218
Model-26	36151259	mRNA	Hua L	TNFRSF1A	−0.065762566
Model-26	36151259	mRNA	Hua L	CLTCL1	−0.944261267
Model-27	34853590	mRNA	Liu SY	MYC	1.69379
Model-27	34853590	mRNA	Liu SY	TERT	1.10141
Model-27	34853590	mRNA	Liu SY	EIF4E3	−0.90781
Model-27	34853590	mRNA	Liu SY	RBM34	1.05725
Model-28	33520450	mRNA	Qiu ZP	NUBP1	−0.2216
Model-28	33520450	mRNA	Qiu ZP	ARHGAP25	−0.0503
Model-28	33520450	mRNA	Qiu ZP	APBB1IP	−0.0429
Model-28	33520450	mRNA	Qiu ZP	PEF1	−0.0230
Model-28	33520450	mRNA	Qiu ZP	USP11	−0.0123
Model-28	33520450	mRNA	Qiu ZP	FUCA1	−0.0104
Model-28	33520450	mRNA	Qiu ZP	S100A13	0.0019
Model-28	33520450	mRNA	Qiu ZP	DLG4	0.0088
Model-28	33520450	mRNA	Qiu ZP	RHBDL2	0.0144
Model-28	33520450	mRNA	Qiu ZP	BNIP3	0.017
Model-28	33520450	mRNA	Qiu ZP	CORO6	0.0425
Model-28	33520450	mRNA	Qiu ZP	KIF25	0.057
Model-28	33520450	mRNA	Qiu ZP	RAD23A	0.0741
Model-28	33520450	mRNA	Qiu ZP	FATE1	0.0862
Model-28	33520450	mRNA	Qiu ZP	STC2	0.0895
Model-28	33520450	mRNA	Qiu ZP	COL13A1	0.091
Model-28	33520450	mRNA	Qiu ZP	SLC38A5	0.1003
Model-28	33520450	mRNA	Qiu ZP	MYC	0.1635
Model-28	33520450	mRNA	Qiu ZP	CGREF1	0.2105
Model-28	33520450	mRNA	Qiu ZP	CORT	0.2504
Model-29	37555953	mRNA	Meng JZ	MT1G	0.17166
Model-29	37555953	mRNA	Meng JZ	G6PD	-0.43611
Model-29	37555953	mRNA	Meng JZ	ARNTL	-1.14148
Model-29	37555953	mRNA	Meng JZ	BNIP3	0.49024
Model-29	37555953	mRNA	Meng JZ	SQLE	0.24118
Model-30	37091161	mRNA	Xia G	CGREF1	1.1077
Model-30	37091161	mRNA	Xia G	TAC4	1.7743
Model-30	37091161	mRNA	Xia G	PROSER2	1.4629
Model-30	37091161	mRNA	Xia G	PCDHB7	-1.2053
Model-31	36531021	mRNA	Zhang L	OGDH	1.299
Model-31	36531021	mRNA	Zhang L	GUF1	-1.34
Model-31	36531021	mRNA	Zhang L	FDX1	1.115
Model-31	36531021	mRNA	Zhang L	ACADVL	1.335
Model-31	36531021	mRNA	Zhang L	PCCB	1.635
Model-31	36531021	mRNA	Zhang L	PDK1	0.658
Model-31	36531021	mRNA	Zhang L	STOML2	0.727
Model-31	36531021	mRNA	Zhang L	LACTB	-0.852
Model-31	36531021	mRNA	Zhang L	UQCRB	1.145
Model-31	36531021	mRNA	Zhang L	MFN2	-2.086
Model-31	36531021	mRNA	Zhang L	CKMT2	0.368
Model-31	36531021	mRNA	Zhang L	ALDH7A1	-0.688
Model-31	36531021	mRNA	Zhang L	TRMT1	1.189
Model-31	36531021	mRNA	Zhang L	EPHX2	0.841
Model-31	36531021	mRNA	Zhang L	BAK1	-1.113
Model-31	36531021	mRNA	Zhang L	SPATA20	-0.958
Model-32	35734428	mRNA	Jin ZJ	LMO2	-0.0376
Model-32	35734428	mRNA	Jin ZJ	MAML3	-0.5804
Model-32	35734428	mRNA	Jin ZJ	MTF2	0.0136
Model-32	35734428	mRNA	Jin ZJ	RBPMS	0.1161
Model-32	35734428	mRNA	Jin ZJ	SIRT1	-0.0061
Model-33	36119478	mRNA	Wu ZW	SLC7A7	-0.36
Model-33	36119478	mRNA	Wu ZW	MYC	0.454
Model-33	36119478	mRNA	Wu ZW	ACSS2	-0.749
Model-34	34916821	mRNA	Fu YC	CLEC5A	-0.96
Model-34	34916821	mRNA	Fu YC	MYC	0.41
Model-35	37465666	mRNA	Mao XY	CD37	-2.284
Model-35	37465666	mRNA	Mao XY	GABRD	3.845
Model-35	37465666	mRNA	Mao XY	ARHGAP25	-3.632
Model-36	36814224	mRNA	Xie L	DLX2	0.4837165
Model-36	36814224	mRNA	Xie L	TERT	0.832482
Model-36	36814224	mRNA	Xie L	EVX1	0.852348
Model-37	36157228	mRNA	Dong CL	TERT	0.12
Model-37	36157228	mRNA	Dong CL	GPX4	-0.03
Model-37	36157228	mRNA	Dong CL	ERCC4	-0.26
Model-37	36157228	mRNA	Dong CL	EPS8	-0.019
Model-37	36157228	mRNA	Dong CL	STAT5A	-0.1
Model-38	36405691	mRNA	Wu JT	GALNT14	0.2624
Model-38	36405691	mRNA	Wu JT	MUC1	0.2547
Model-39	35754801	mRNA	Zhang Z	ATP6V0D1	-1.523
Model-39	35754801	mRNA	Zhang Z	PREB	0.903
Model-39	35754801	mRNA	Zhang Z	STC2	0.586
Model-39	35754801	mRNA	Zhang Z	TSPYL2	-0.76
Model-40	33952279	mRNA	Liu H	FTO	-1.066
Model-40	33952279	mRNA	Liu H	IGF2BP1	0.271
Model-41	37441535	mRNA	Zhang ZH	CGREF1	0.004
Model-41	37441535	mRNA	Zhang ZH	CORT	0.004
Model-41	37441535	mRNA	Zhang ZH	RHBDL2	0.002
Model-42	37139222	mRNA	Zhang YM	NUDT11	−0.27242
Model-42	37139222	mRNA	Zhang YM	NUDT16	−1.21282
Model-42	37139222	mRNA	Zhang YM	CYFIP1	−3.09094
Model-42	37139222	mRNA	Zhang YM	EIF4E3	−0.15031
Model-42	37139222	mRNA	Zhang YM	LARP1	0.50841
Model-42	37139222	mRNA	Zhang YM	EIF4A1	0.40932
Model-43	37231440	lncNA	Tang ZF	SNHG17	0.60286
Model-43	37231440	lncNA	Tang ZF	LINC00837	0.64943
Model-44	36204682	mRNA	Hu L	PDK1	1.1
Model-44	36204682	mRNA	Hu L	LOX	1.17
Model-44	36204682	mRNA	Hu L	DCN	-1.53
Model-44	36204682	mRNA	Hu L	HMOX1	-0.9
Model-45	32098942	miRNA	Luo XL	hsa-miR-153	4.93807
Model-45	32098942	miRNA	Luo XL	hsa-miR-591	−1.81787
Model-45	32098942	miRNA	Luo XL	hsa-miR-212	2.38397
Model-46	36578780	mRNA	Zhang WS	BNIP3	0.6371
Model-46	36578780	mRNA	Zhang WS	SLC38A5	0.3938
Model-46	36578780	mRNA	Zhang WS	SLC5A3	-0.563
Model-46	36578780	mRNA	Zhang WS	CKMT2	0.3709
Model-46	36578780	mRNA	Zhang WS	S100A3	-0.6061
Model-46	36578780	mRNA	Zhang WS	CXCL11	-0.4593
Model-46	36578780	mRNA	Zhang WS	PGM1	-0.7056
Model-47	34016089	mRNA	He LJ	CD70	0.00811225
Model-47	34016089	mRNA	He LJ	TNFRSF9	0.0362463
Model-47	34016089	mRNA	He LJ	EGFR	0.0561105
Model-47	34016089	mRNA	He LJ	PDGFD	-0.00815934
Model-47	34016089	mRNA	He LJ	S100A6	0.00022664
Model-48	33754909	mRNA	Li B	DDX24	-0.99985
Model-48	33754909	mRNA	Li B	DDX21	1.36765
Model-48	33754909	mRNA	Li B	WARS	-0.43916
Model-48	33754909	mRNA	Li B	IGF2BP2	0.250946
Model-49	35966307	mRNA	Li GQ	STAT4	−0.0101
Model-49	35966307	mRNA	Li GQ	HSPE1	0.1698
Model-49	35966307	mRNA	Li GQ	ARPC5	−0.0037
Model-50	34337075	mRNA	Jiang F	EFNA1	0.74
Model-50	34337075	mRNA	Jiang F	P4HA1	0.63
Model-50	34337075	mRNA	Jiang F	STC2	0.31
Model-50	34337075	mRNA	Jiang F	MAFF	0.62
Model-51	35435626	mRNA	Tian KS	RAI14	-0.13627
Model-51	35435626	mRNA	Tian KS	MAF	-0.13439
Model-51	35435626	mRNA	Tian KS	CLEC5A	-0.307138
Model-51	35435626	mRNA	Tian KS	TIAL1	0.09256
Model-51	35435626	mRNA	Tian KS	CENPJ	0.0505907
Model-52	35504036	mRNA	Yang F	TERT	0.198439
Model-52	35504036	mRNA	Yang F	TRAP1	0.610526
Model-52	35504036	mRNA	Yang F	DNM1L	0.099215
Model-52	35504036	mRNA	Yang F	BAG5	0.199478
Model-52	35504036	mRNA	Yang F	PLEKHF1	-0.303504
Model-52	35504036	mRNA	Yang F	PPP3CB	-0.338832
Model-53	34604383	mRNA	Li JY	ATG4A	-1.155
Model-53	34604383	mRNA	Li JY	MYC	0.478
Model-54	35282067	mRNA	Liu Z	RP2	−0.8445
Model-54	35282067	mRNA	Liu Z	PHB	−0.7205
Model-54	35282067	mRNA	Liu Z	MYO6	0.8332
Model-54	35282067	mRNA	Liu Z	MLH1	−0.9115
Model-54	35282067	mRNA	Liu Z	CSNK2B	−0.6136
Model-54	35282067	mRNA	Liu Z	RPL37A	0.6677
Model-54	35282067	mRNA	Liu Z	CEBPA	−0.5183
Model-55	32854645	mRNA	Hu C	FCGR2B	-0.766
Model-55	32854645	mRNA	Hu C	GFAP	0.702
Model-55	32854645	mRNA	Hu C	MPP7	0.387
Model-56	37102261	mRNA	Gong HL	CDK3	2.0065
Model-56	37102261	mRNA	Gong HL	MYC	0.9253
Model-56	37102261	mRNA	Gong HL	UHRF2	0.6018
Model-56	37102261	mRNA	Gong HL	STC2	0.4926
Model-56	37102261	mRNA	Gong HL	COL5A2	0.418
Model-56	37102261	mRNA	Gong HL	MMD	-1.0587
Model-56	37102261	mRNA	Gong HL	EHMT2	-1.2564
Model-57	34733853	mRNA	Xiao B	DLL1	0.457925
Model-57	34733853	mRNA	Xiao B	EOMES	−0.1851977
Model-57	34733853	mRNA	Xiao B	ERCC2	−1.1867301
Model-57	34733853	mRNA	Xiao B	FOLR1	0.229386
Model-57	34733853	mRNA	Xiao B	MEF2C	0.403831
Model-57	34733853	mRNA	Xiao B	PSMA5	−0.775786
Model-57	34733853	mRNA	Xiao B	PTN	−0.246729
Model-57	34733853	mRNA	Xiao B	SPI1	−0.2701665
Model-58	35602303	mRNA	Kang YX	COL13A1	0.0339348
Model-58	35602303	mRNA	Kang YX	MXI1	0.174822
Model-58	35602303	mRNA	Kang YX	TBRG1	0.0303896
Model-59	34162161	mRNA	Yang MK	C3AR1	-0.1052
Model-59	34162161	mRNA	Yang MK	TYROBP	-0.0041
Model-60	30569146	mRNA	Sun K	CH17-360D5.2	−2.0368
Model-60	30569146	mRNA	Sun K	LINC00987	−0.0683
Model-60	30569146	mRNA	Sun K	LINC01526	−6.0924
Model-60	30569146	mRNA	Sun K	RP11-15A1.3	−3.6727
Model-60	30569146	mRNA	Sun K	RP11-213H15.1	−4.9249
Model-60	30569146	mRNA	Sun K	RP11-218F4.1	−0.1602
Model-60	30569146	mRNA	Sun K	RP11-242F11.2	−3.7582
Model-60	30569146	mRNA	Sun K	RP11-411H5.1	−0.0093
Model-60	30569146	mRNA	Sun K	RP11-834C11.5	7.8606
Model-61	35422168	mRNA	Yang K	SNHG7	0.062
Model-61	35422168	mRNA	Yang K	SNHG12	0.115
